# Supplementary material for: Early versus Late Onset Colorectal Cancer: Pathological Distinctions and Optimal Screening Age Determination in a Decade-Long Study
Source: Research Square preprint supplement (doi:10.21203/rs.3.rs-3960581/v1), 2024-03-04

Table 1 : EO-CRC and LO-CRC Patient demographics and baseline characteristics

Age

Characteristic

p-value2

0.368

LO-CRC, N = 6,0341

EO-CRC, N = 1,6751

Gender

male

3,561 (59.0%)

2,473 (41.0%)

41.49

968 (57.8%)

707 (42.2%)

64.33

female

Average age (year)

MMR

<0.001

<0.001

dMMR

430 (7.2%)

5575 (92.8%)

29

232 (13.9%)

1435 (86.1%)

8

pMMR

Unknown

TNM

Ⅰ

1,040 (19.1%)

1,601 (29.4%)

1,770 (32.5%)

1,042 (19.1%)

581

216 (14.4%)

455 (30.4%)

502 (33.6%)

323 (21.6%)

179

Ⅱ

Ⅲ

Ⅳ

Unknown

AFP (ng/ml)

CEA (ng/ml)

CA199 (U/ml)

CA125 (U/ml)

Fecal occult blood test

positivity

negative

32.21 ± 1,648.61

36 ± 441

8.66 ± 154.62

27 ± 211

0.275

0.239

0.727

0.256

0.332

107 ± 1,368

19 ± 88

119 ± 1,188

22 ± 97

4,267 (70.7%)

1,767 (29.3%)

1,164 (69.5%)

511 (30.5%)

Preineural invasion

positivity

negative

<0.001

<0.001

4,982 (82.6%)

1,052 (17.4%)

1,443 (86.1%)

232 (13.9%)

Vasculature invasion


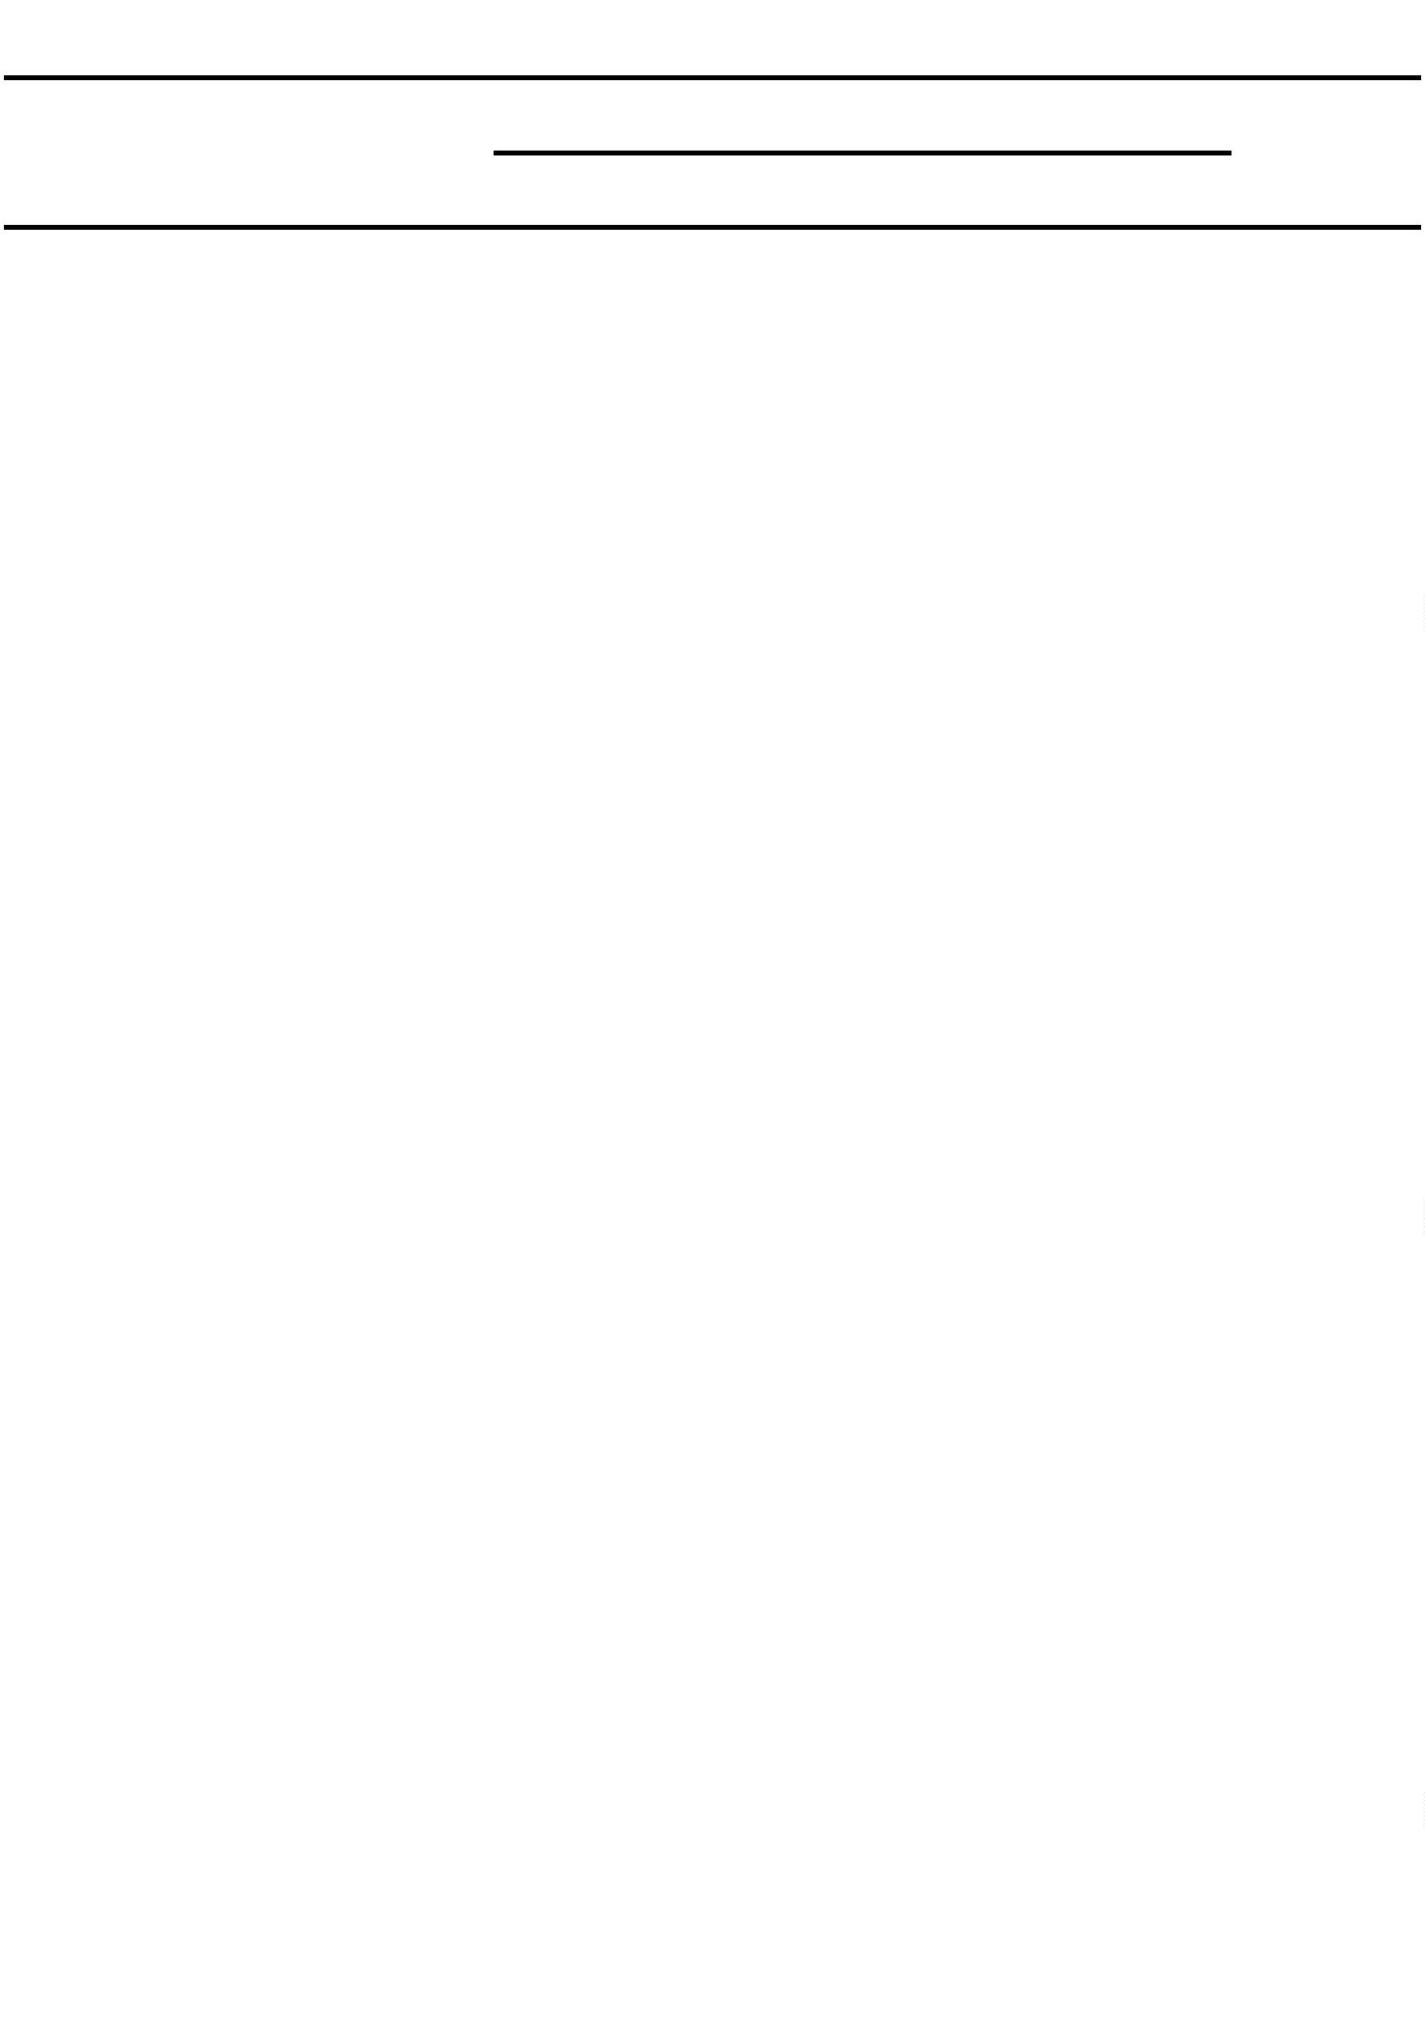


positivity

3,249 (53.8%)

2,785 (46.2%)

40.7 ± 5.8

5.42 ± 12.55

8.4 ± 5.7

1,039 (62.0%)

636 (38.0%)

41.9 ± 5.9

5.44 ± 12.83

8.3 ± 5.8

negative

Albumin (g/L)

<0.001

0.946

Direct bilirubin (μmol/L)

Indirect bilirubin (μmol/L)

Alkaline phosphatase (U/L)

γ-Glutamyl Transferase (μ/L)

HB (g/L)

0.478

83 ± 50

78 ± 44

<0.001

0.465

29 ± 60

30 ± 55

126 ± 23

124 ± 25

<0.001

<0.001

0.207

PLT (10^9)

217 ± 80

245 ± 96

APTT (s)

31 ± 8

32 ± 7

PT (s)

12.29 ± 1.41

12.37 ± 1.37

0.037

1

n (%); Mean ± SD

Pearson's Chi-squared test; Welch Two Sample t-test

2

Alpha-Fetal Protein (AFP); Carcinoembryonic antigen (CEA); Carbohydrate antigen 199 (CA199);

Carbohydrate antigen 125 (CA125); Hemoglobin (HB); Platelet (HB); Activated partial thromboplastin

time (APTT); Prothrombin time (PT).


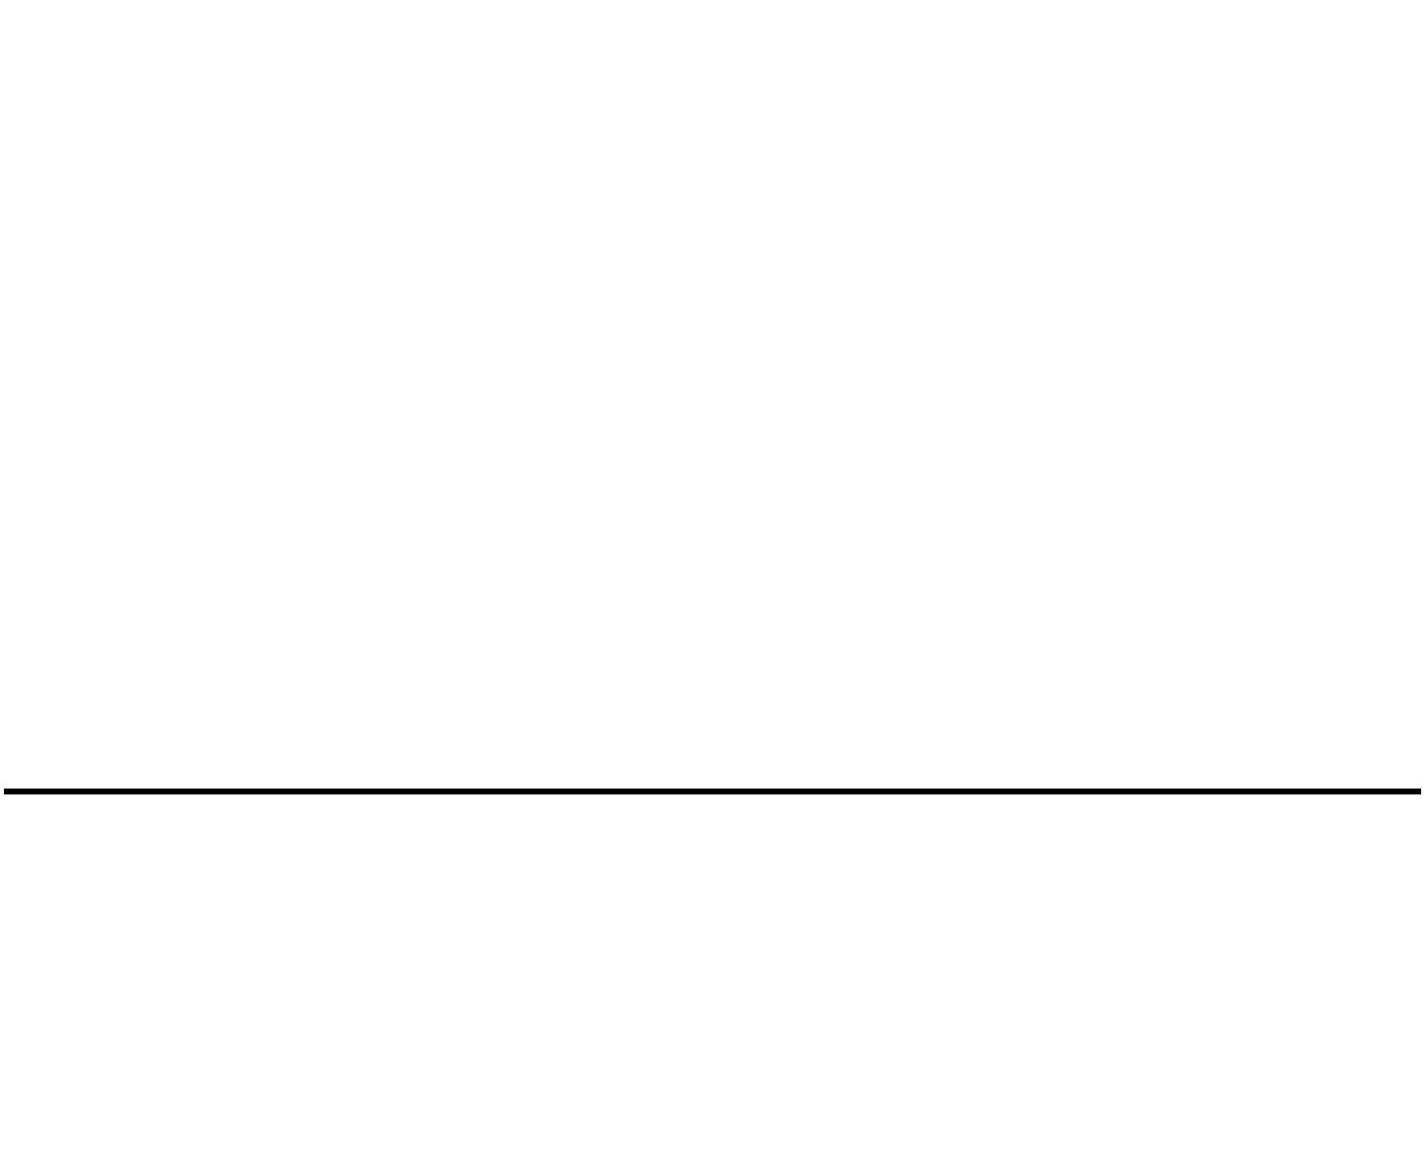

Supplement: Supplementary file 1 [file e3ab630cba54a12f8da515c7.docx]
